# Supplementary material
Source: PubMed Central journal article supplement (PMC8370274)
Supplement: Supp_FigureS3.pdf [file Supp_FigureS3.pdf]

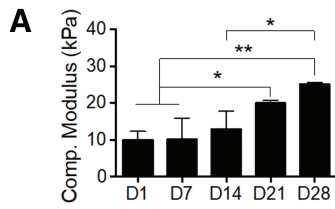

| Day | kPa (avg) | kPa (St Dev) |
|-----|-----------|--------------|
| 1   | 9.950     | 2.358        |
| 7   | 10.191    | 5.671        |
| 14  | 12.978    | 4.768        |
| 21  | 19.982    | 0.725        |
| 28  | 25.094    | 0.467        |

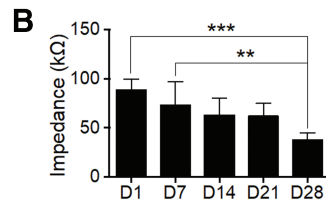

| Day | kΩ (avg) | kΩ (St Dev) |
|-----|----------|-------------|
| 1   | 96.494   | 2.558       |
| 7   | 90.786   | 2.114       |
| 14  | 68.536   | 1.796       |
| 21  | 65.577   | 1.389       |
| 28  | 39.015   | 2.063       |

**SUPPLEMENTARY FIG. S3.** Cell-laden mineralized samples additional data. **(A)** Compressive modulus of mineralized samples across incubation period. Note the statistically significant difference which occurs after 3 and 4 weeks. **(B)** Impedance measurements of osteogenically mineralized 10% GelMA samples across representative incubation days. \* $p < 0.05$ , \*\* $p < 0.01$ , \*\*\* $p < 0.001$ .
